# Supplementary material for: Investigation of ‘Head-to-Tail’-Connected Oligoaryl N,O-Ligands as Recognition Motifs for Cancer-Relevant G-Quadruplexes
Source: PubMed Central journal article supplement (PMC6149995; doi:10.3390/molecules22122160), 2017-12-06

# Investigation of ‘Head-to-Tail’-Connected Oligoaryl *N,O*-Ligands as Recognition Motifs for Cancer-Relevant G-Quadruplexes

Natalia Rizeq <sup>1</sup> and Savvas N. Georgiades <sup>1,\*</sup>

<sup>1</sup> Department of Chemistry, University of Cyprus, 1 Panepistimiou Avenue, Aglandjia, 2109, Nicosia, Cyprus

\* Correspondence: georgiades.savvas@ucy.ac.cy; Tel.: +357-22-892779

## Supplementary Materials

### Table of Contents

|                                                  |      |
|--------------------------------------------------|------|
| • <sup>1</sup> H and <sup>13</sup> C NMR spectra | S-2  |
| • Fluorescence titration curves                  | S-13 |
| • FRET melting temperature curves                | S-16 |
| • $\Delta T_m$ for Fds26T                        | S-22 |

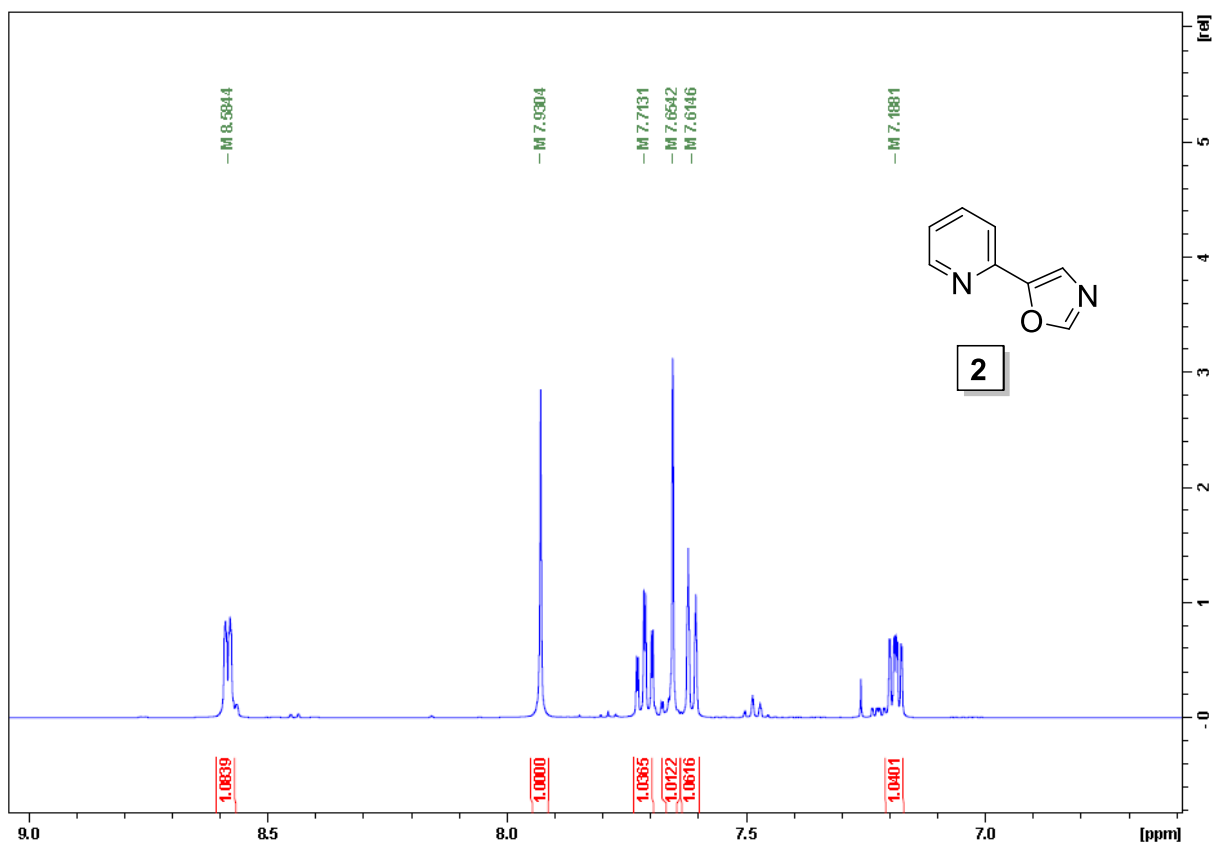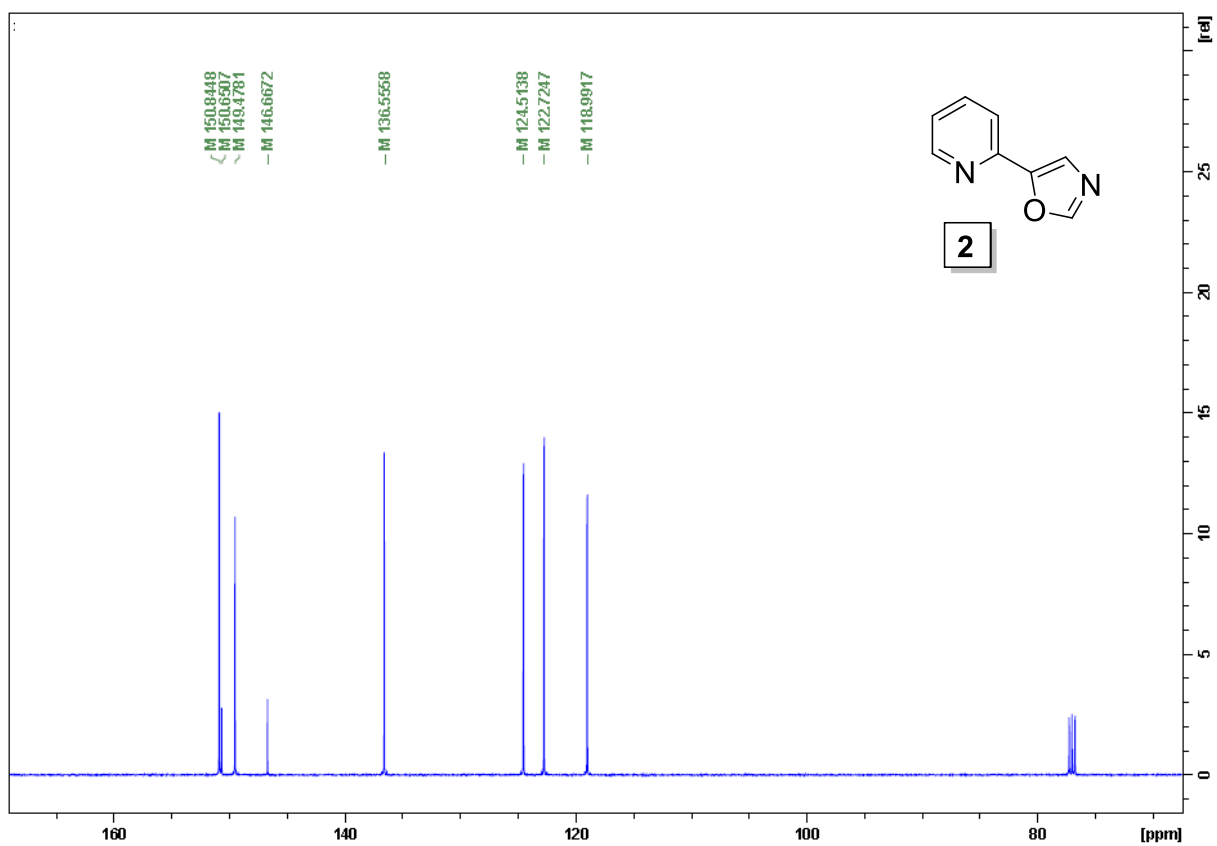

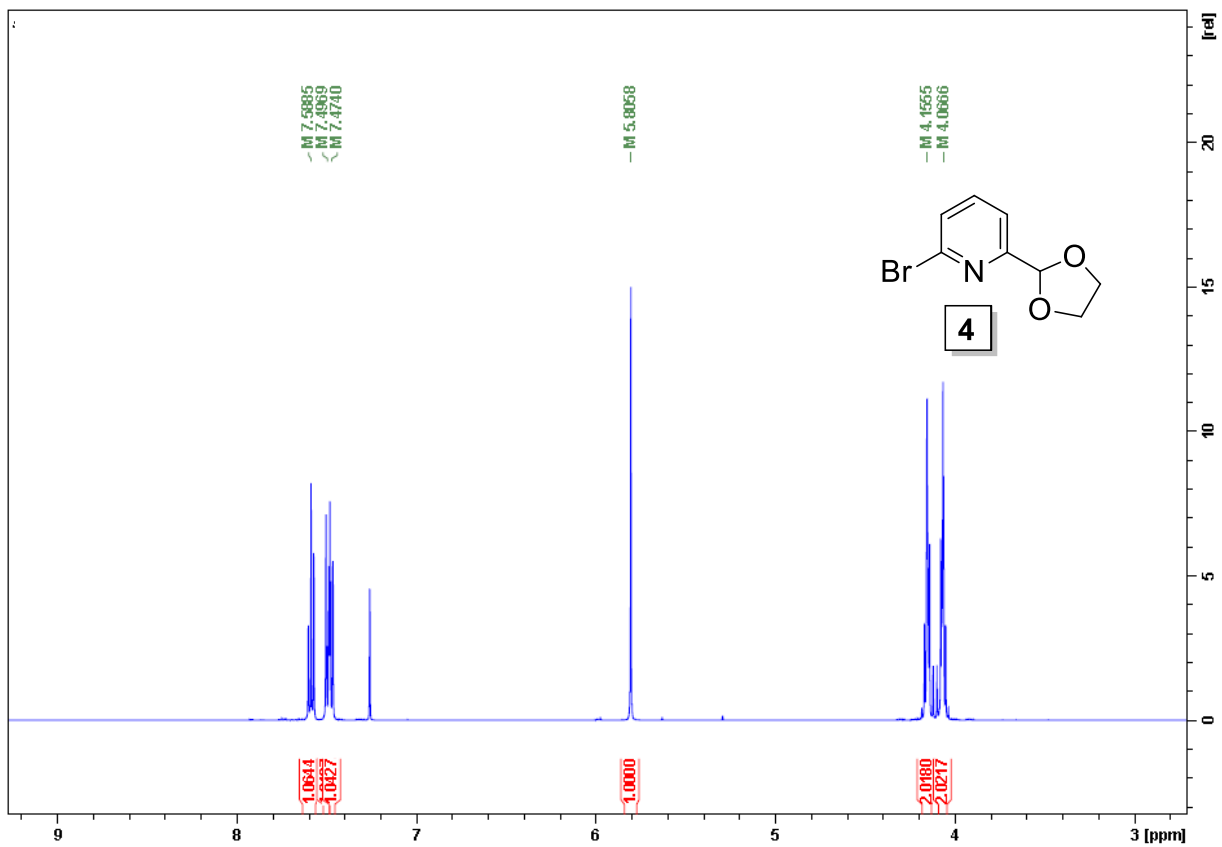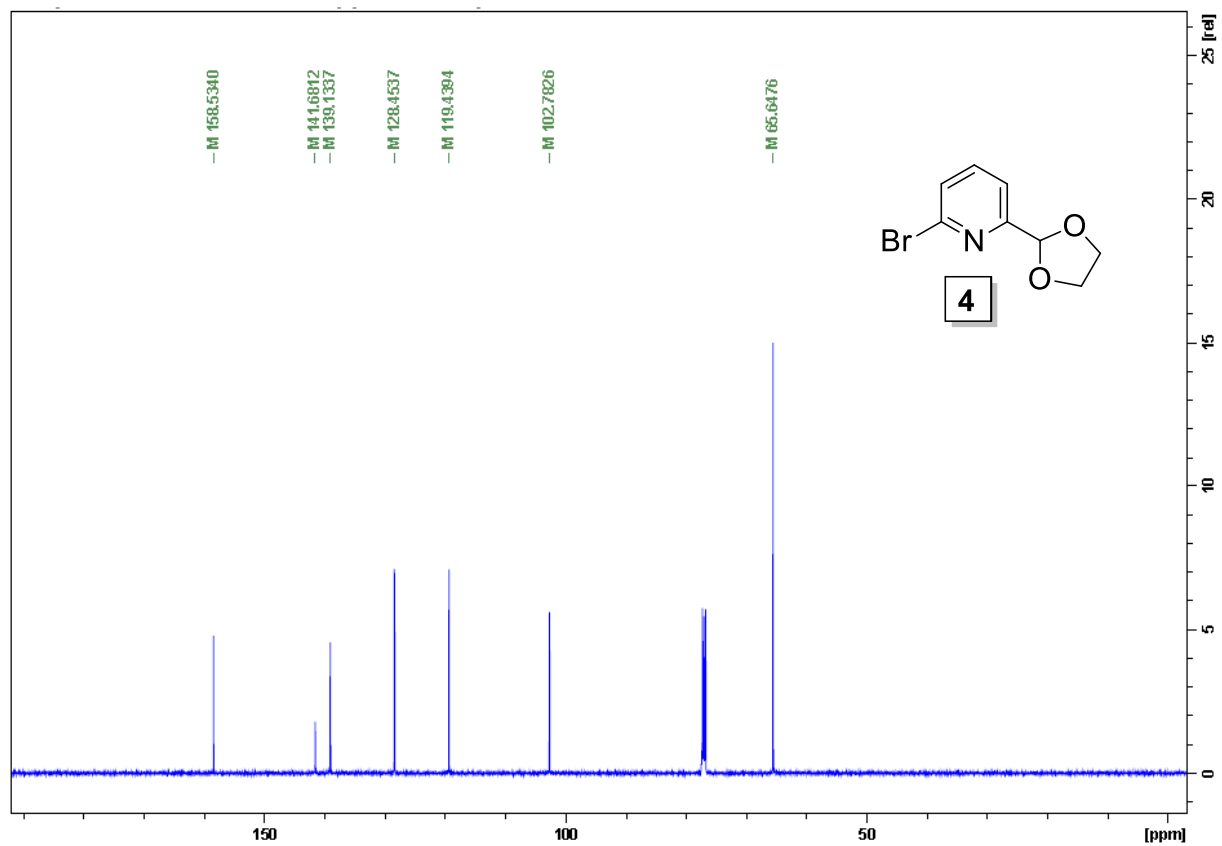

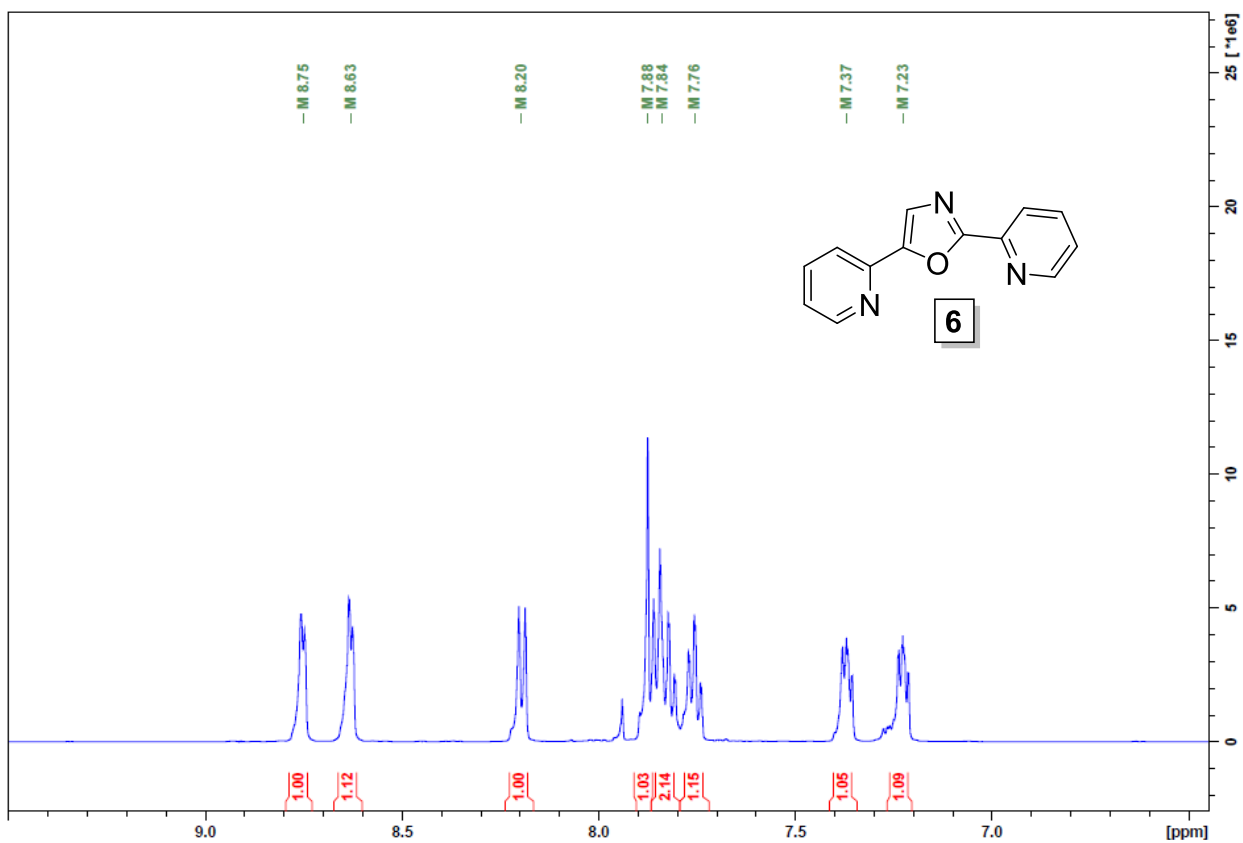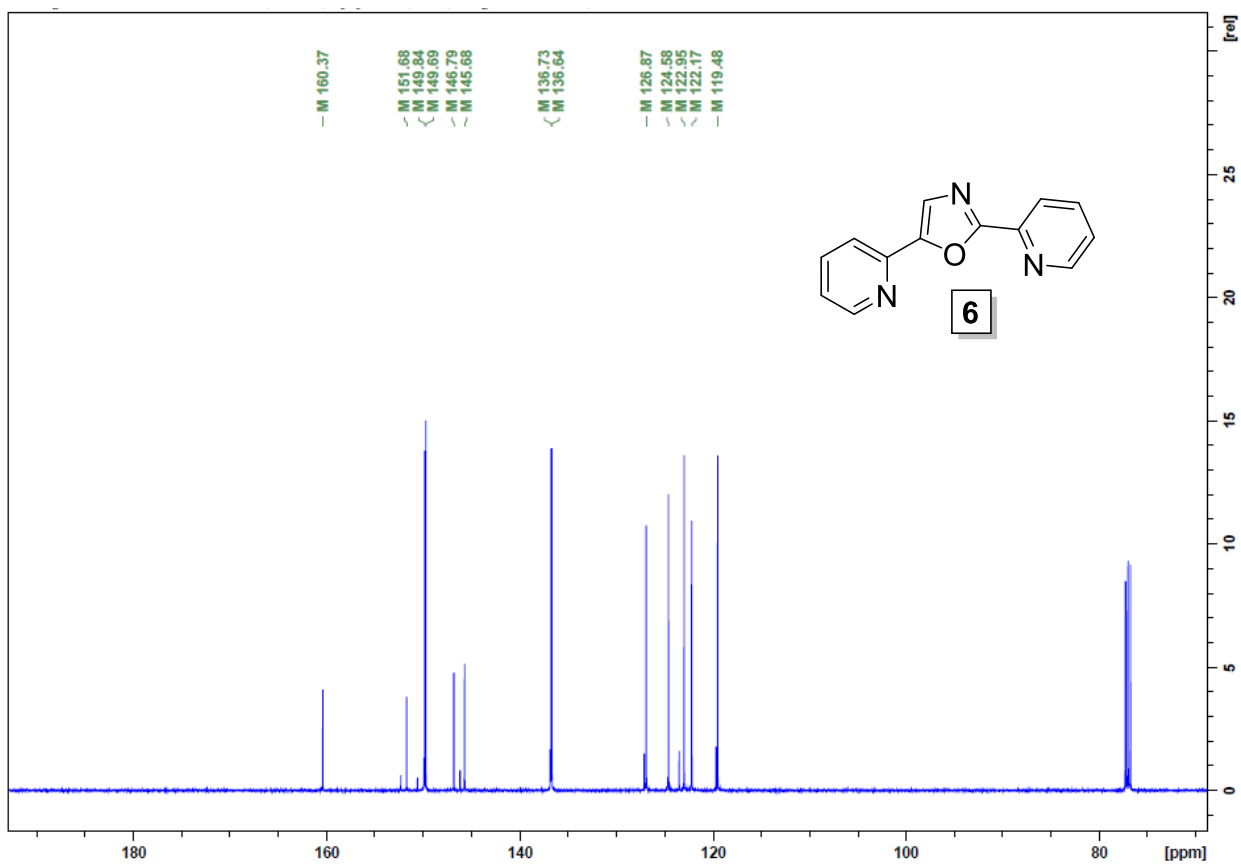

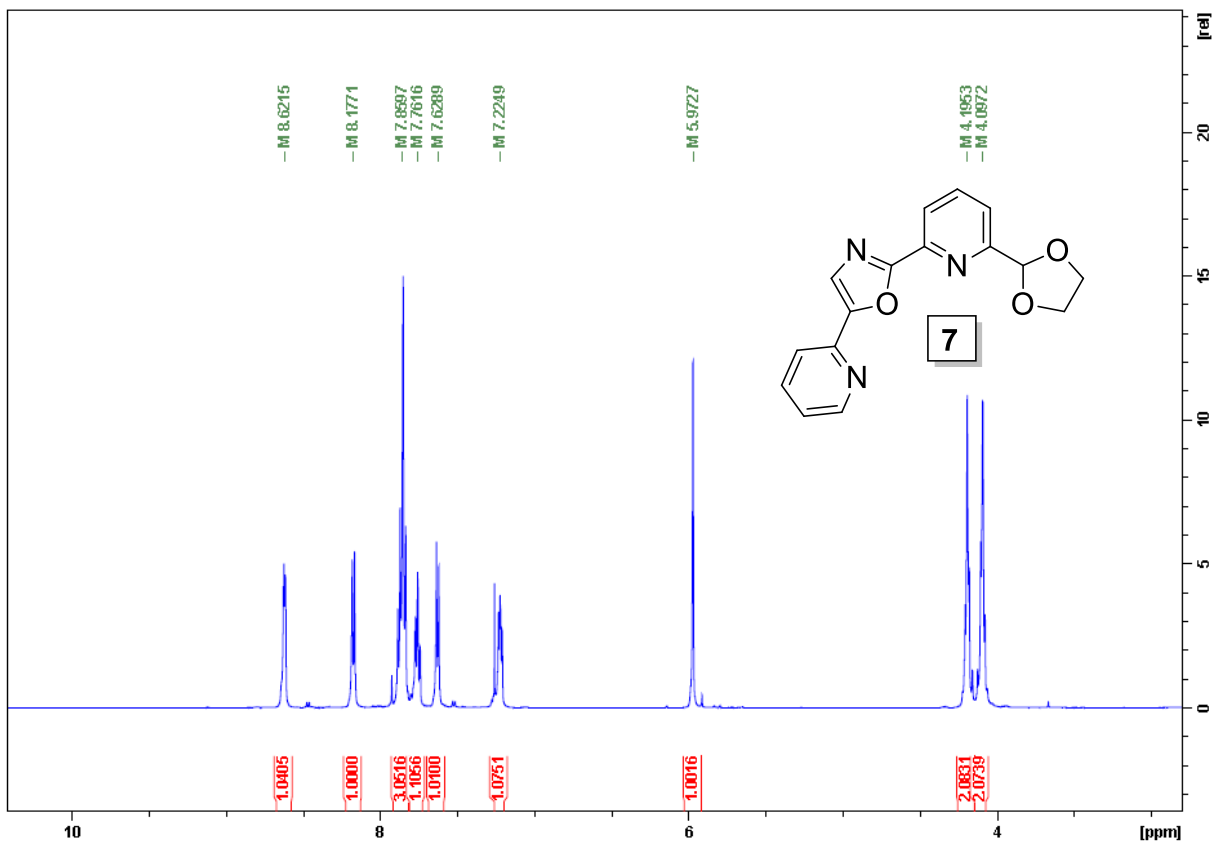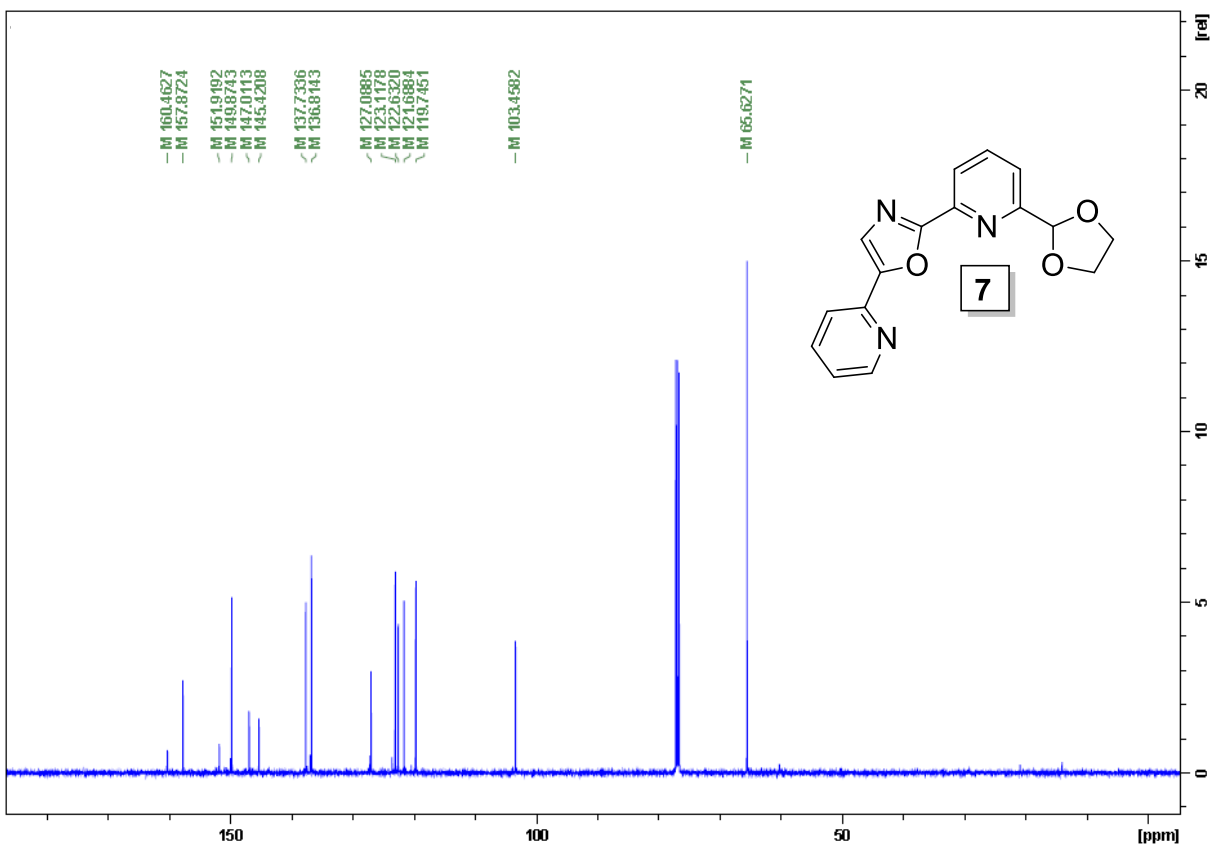

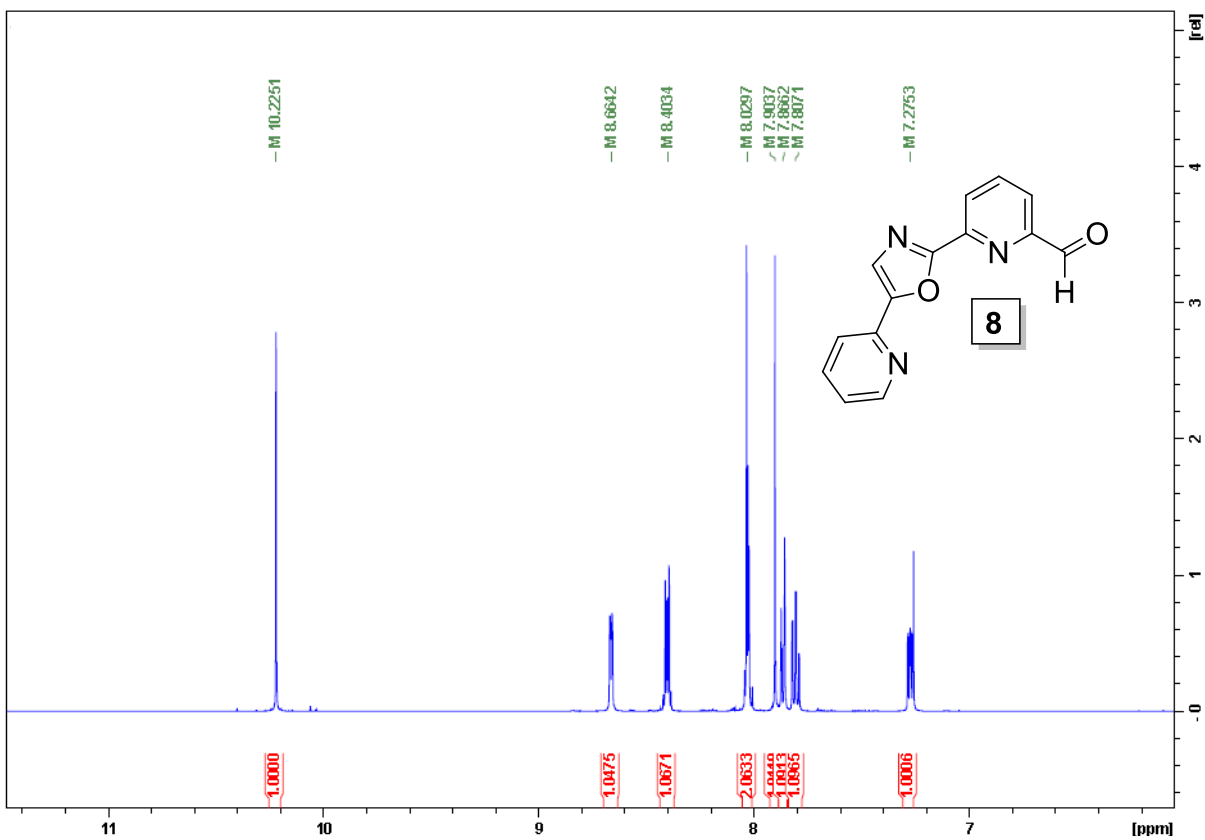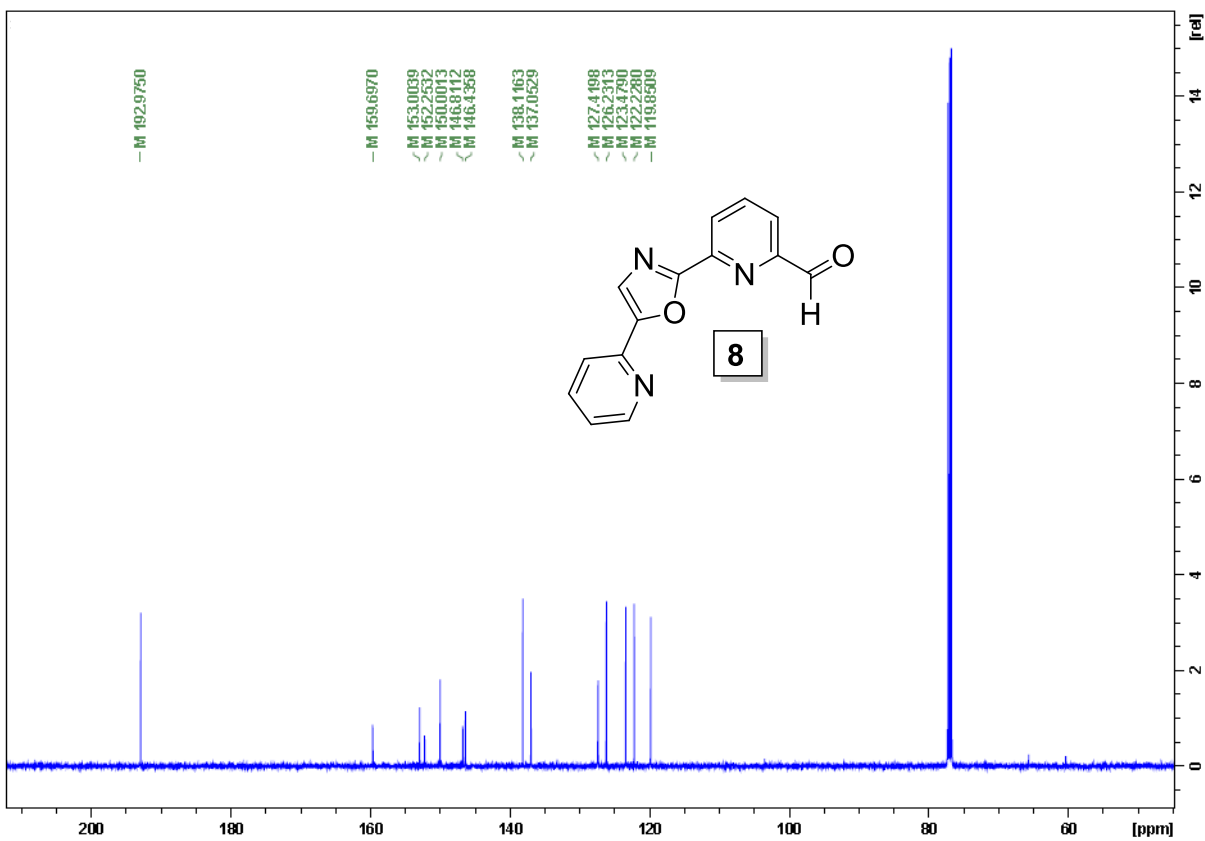

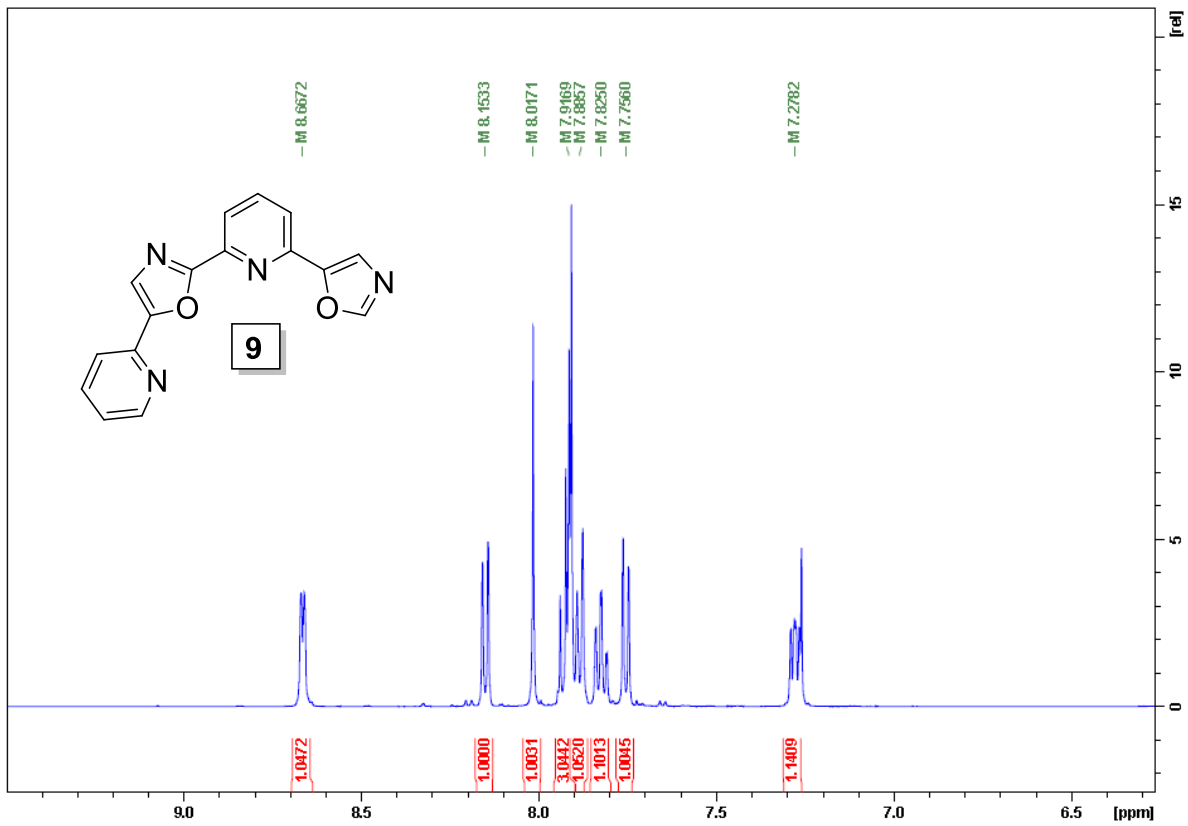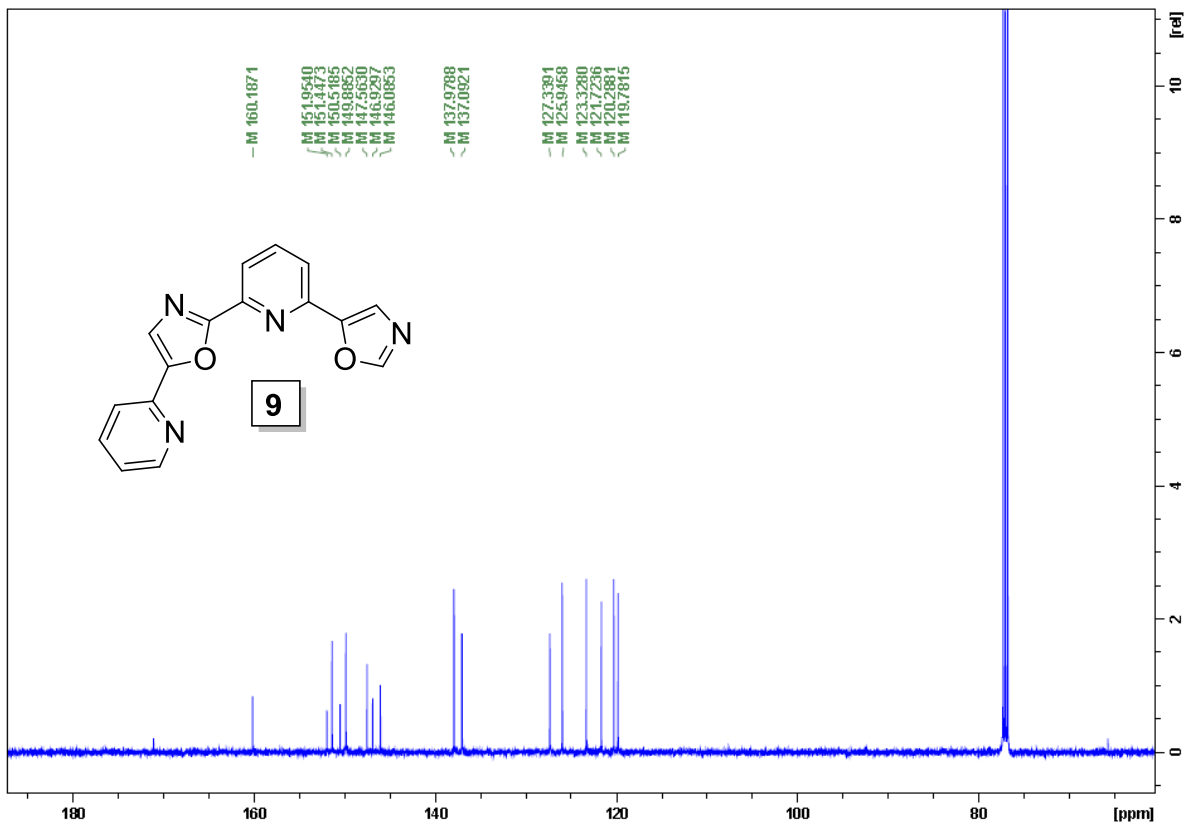

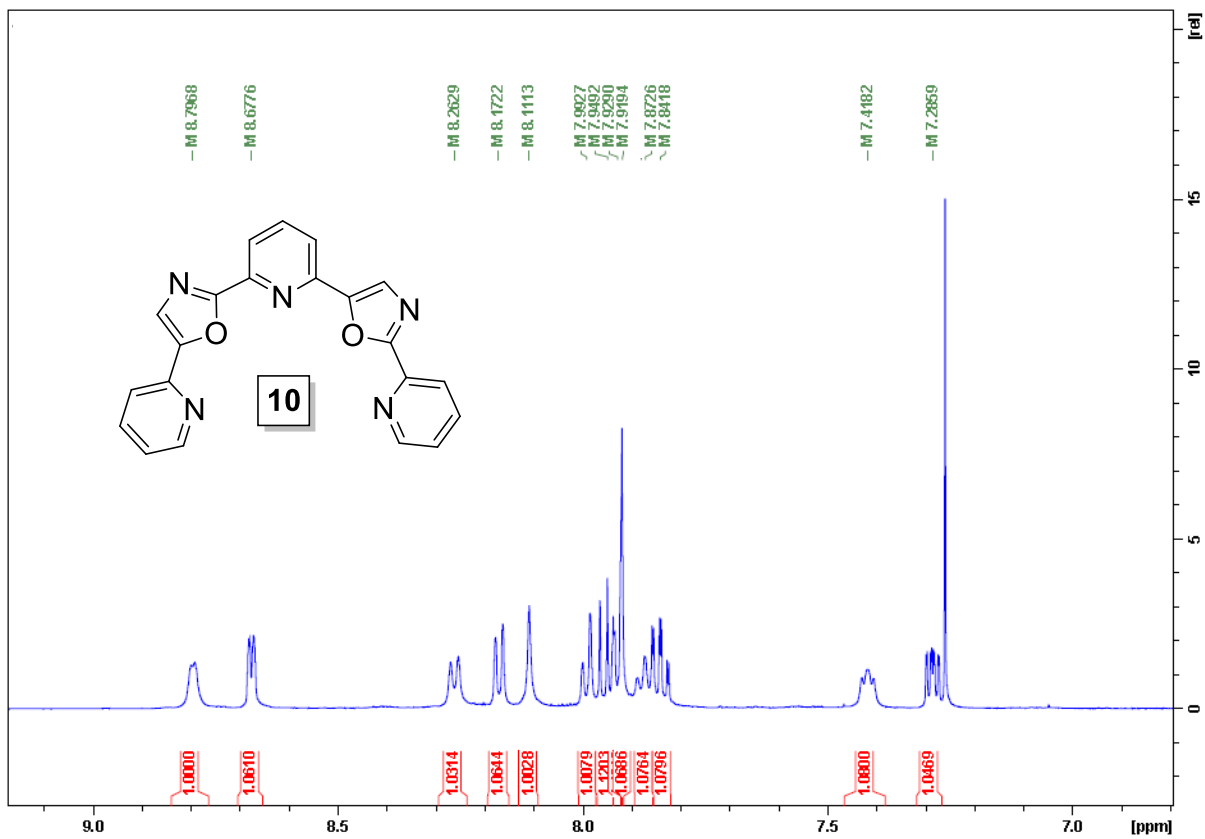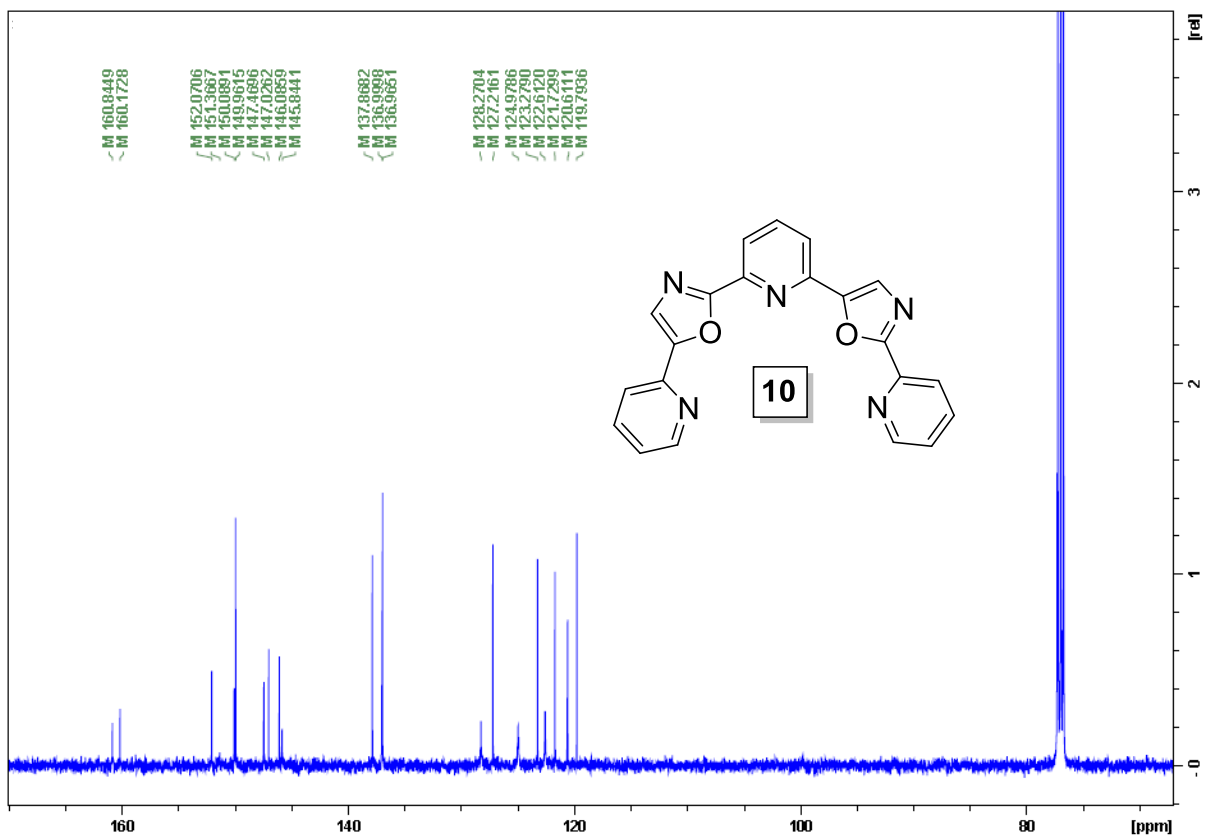



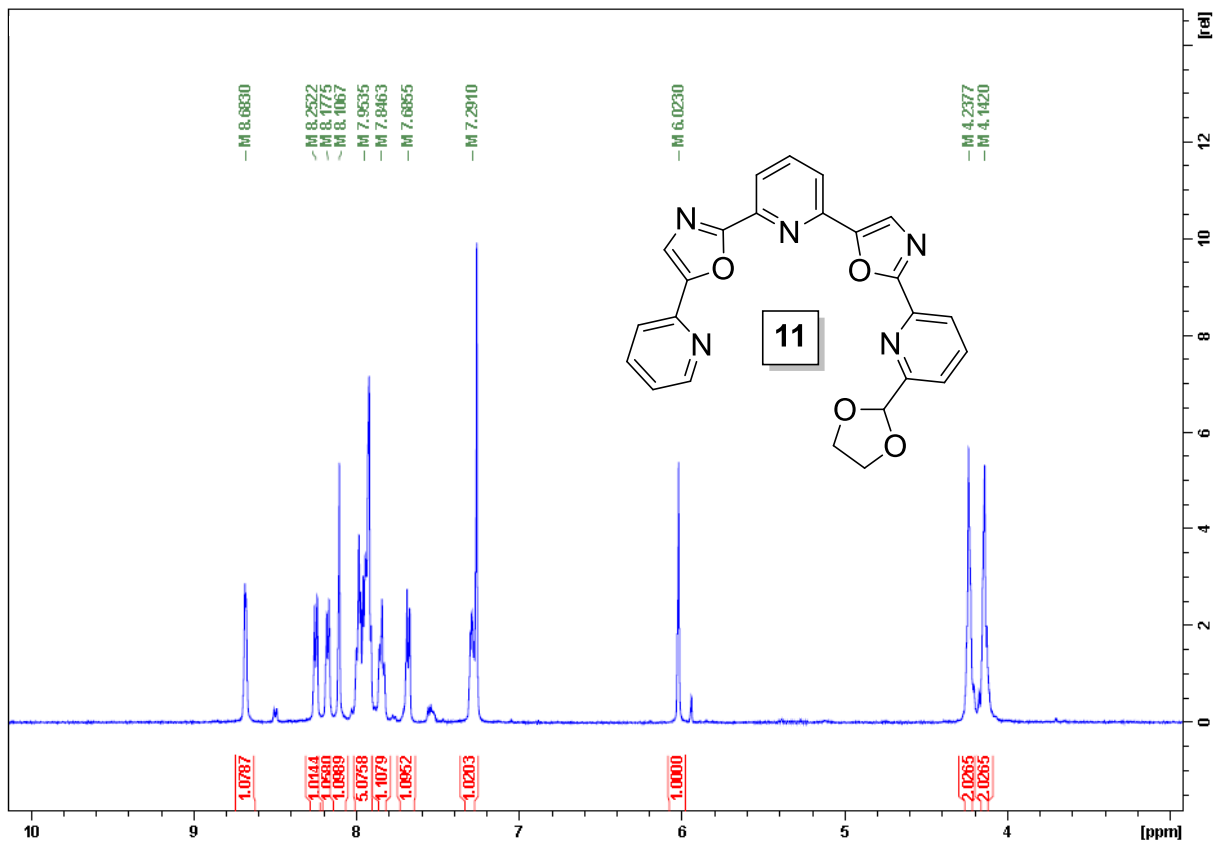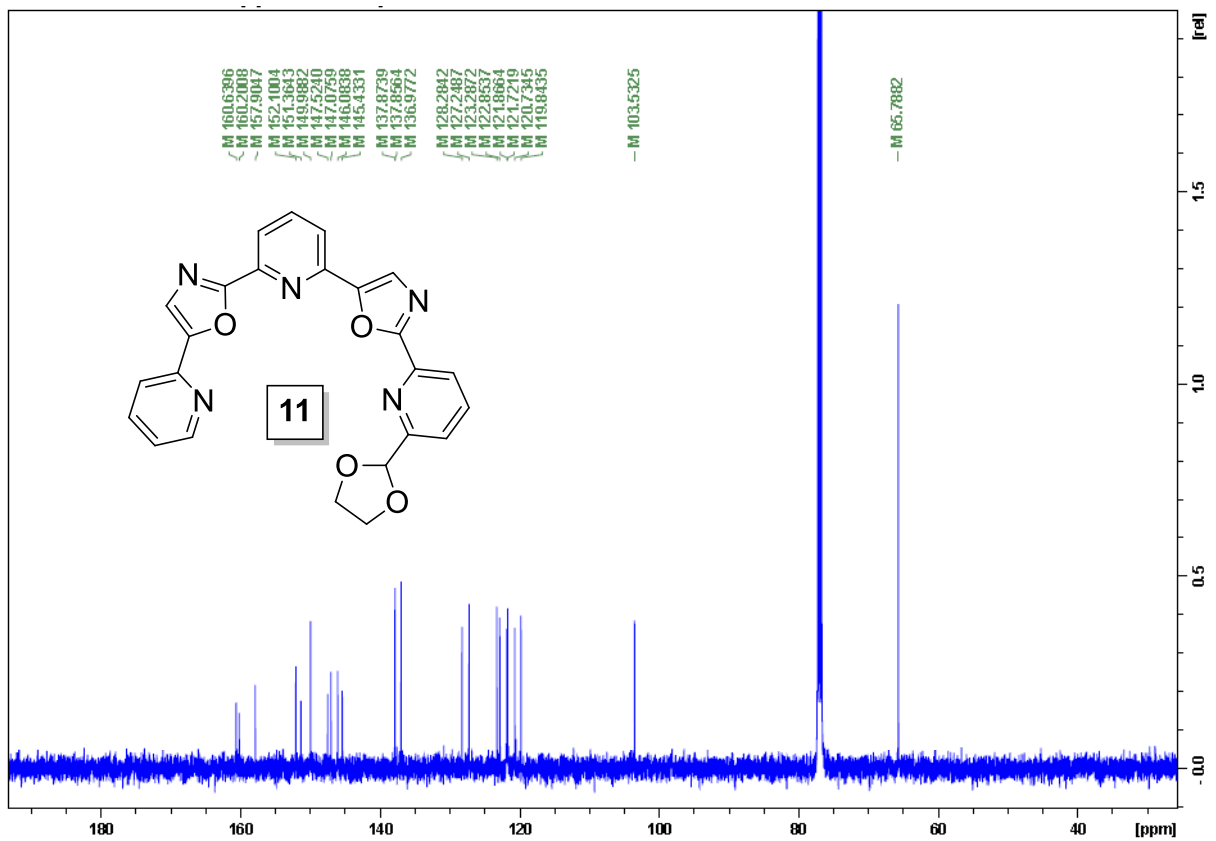

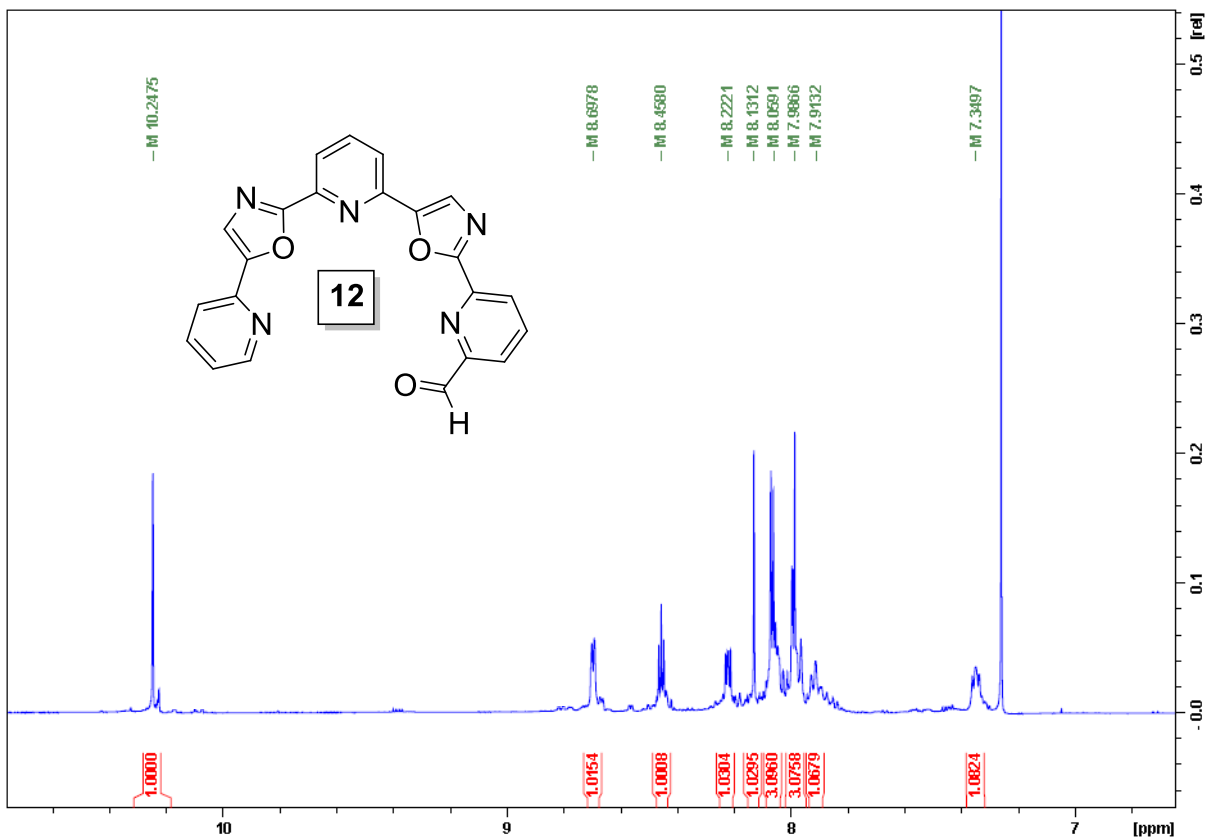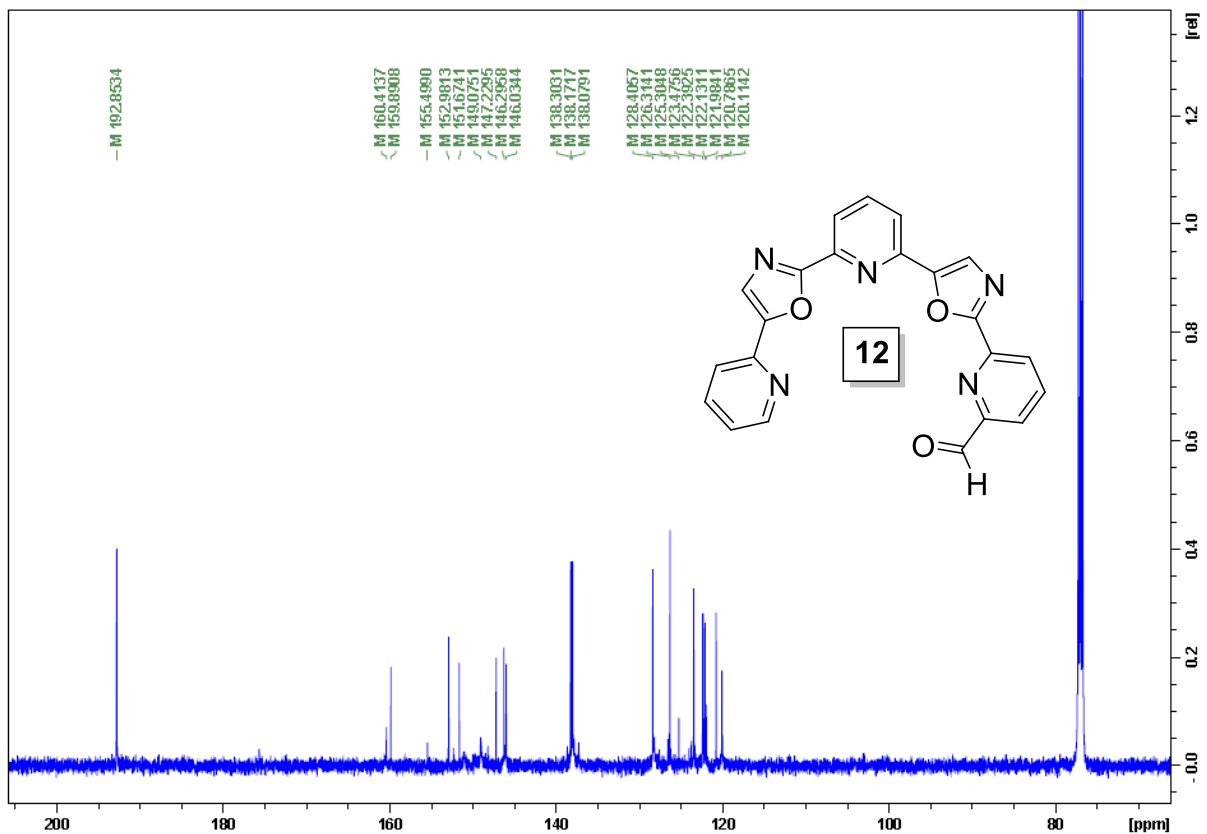

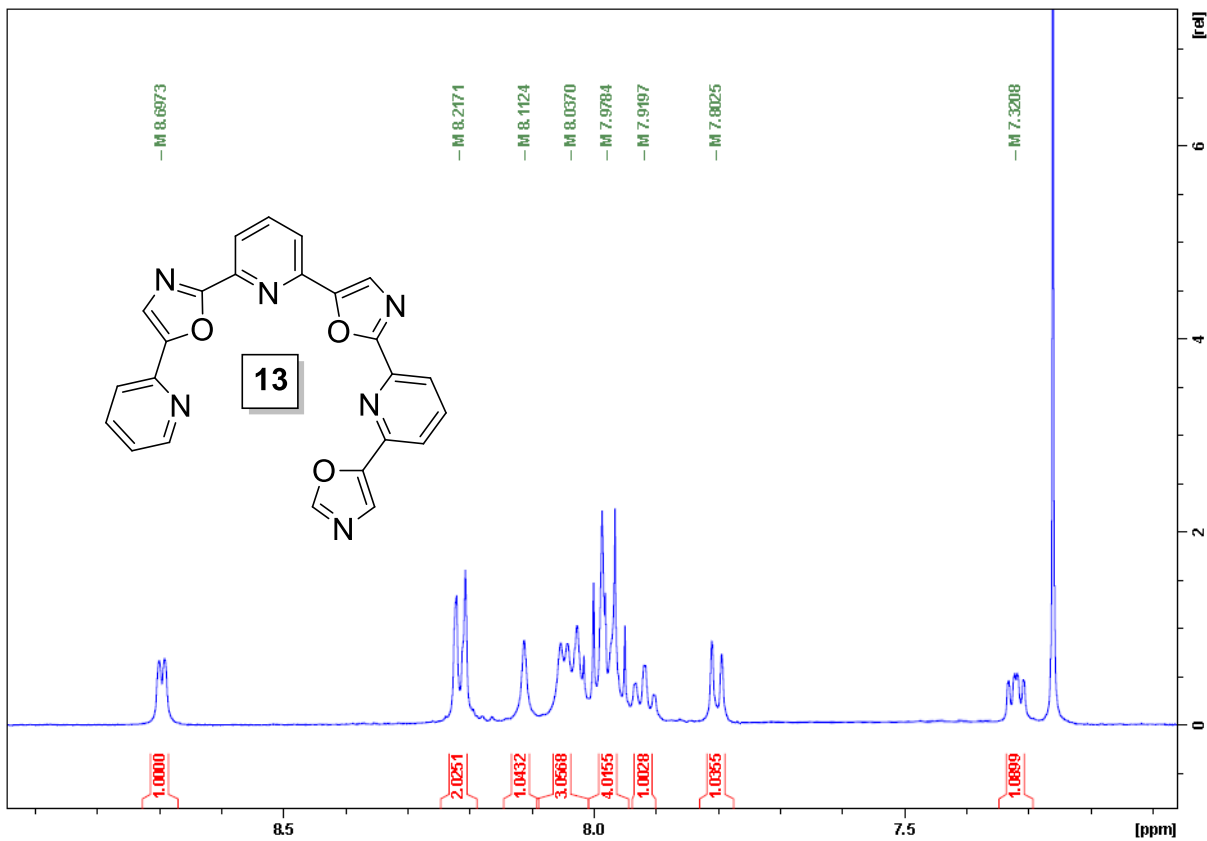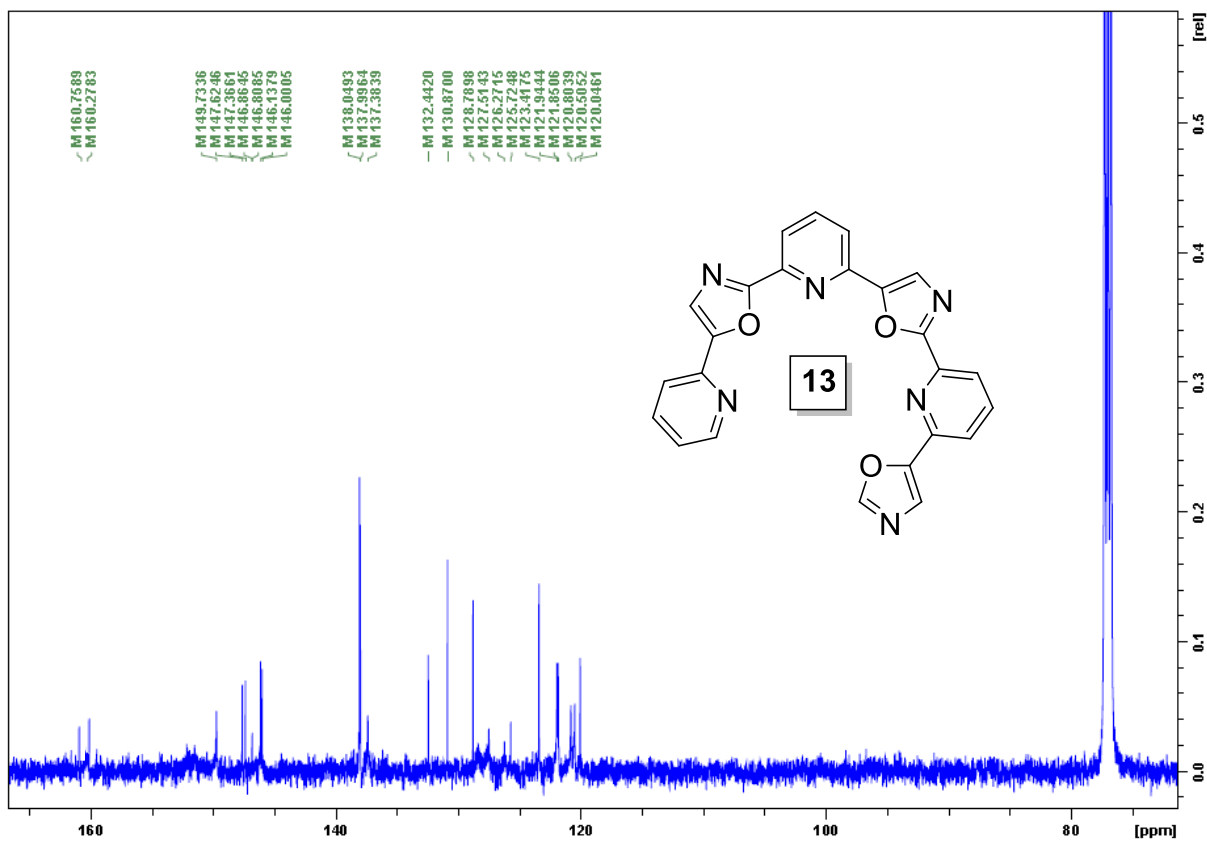

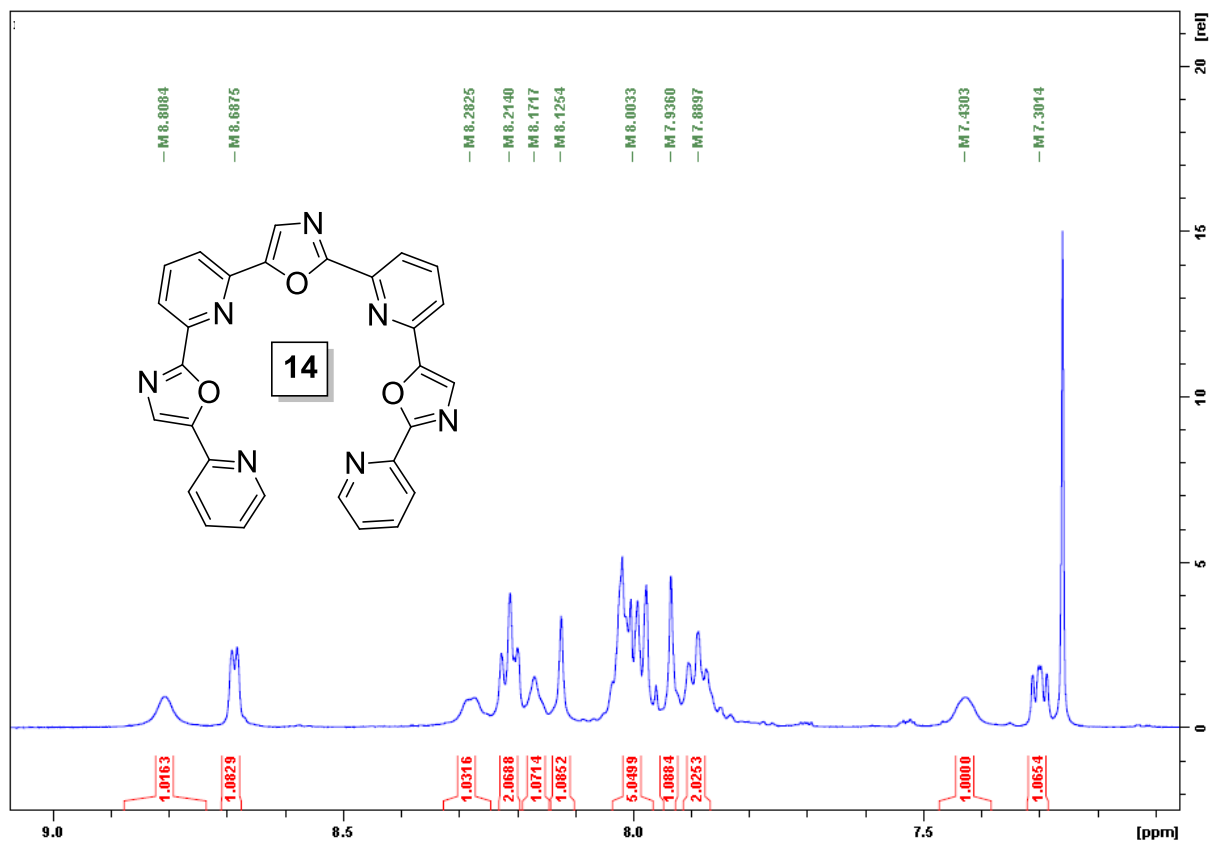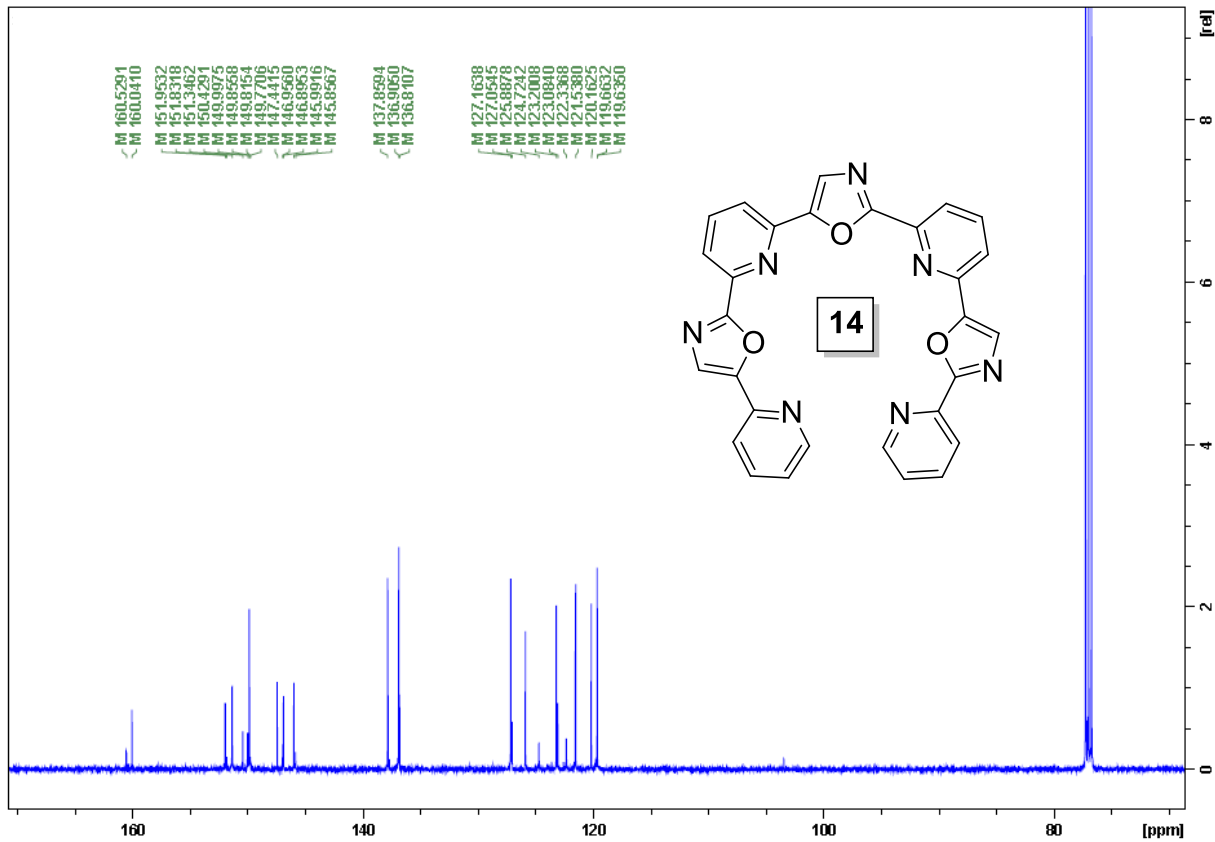

22AG (telomeric)/K<sup>+</sup>/5-mer (10):

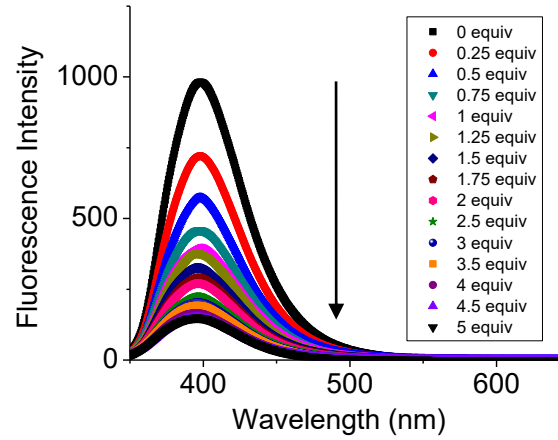

22AG (telomeric)/K<sup>+</sup>/6-mer (13):

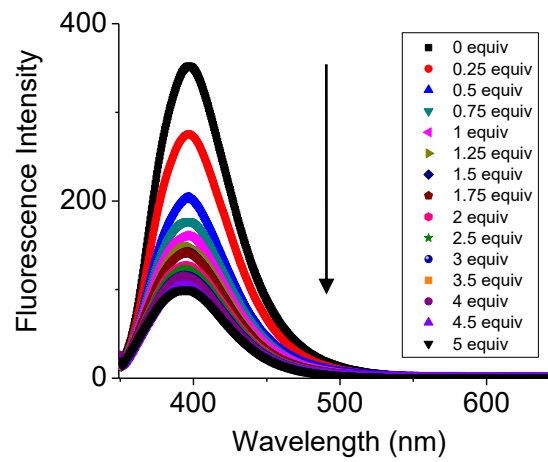

22AG (telomeric)/K<sup>+</sup>/7-mer (14):

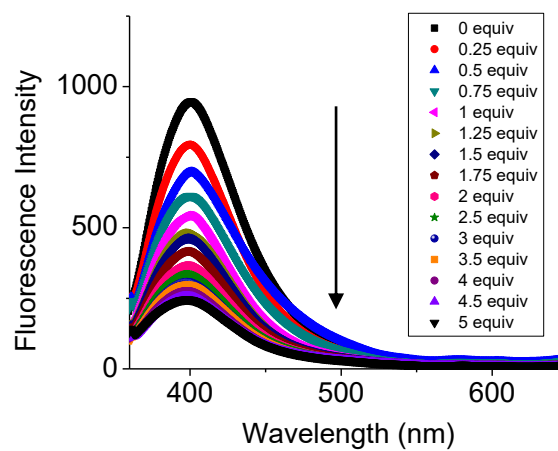

22AG (telomeric)/Na<sup>+</sup>/5-mer (10):

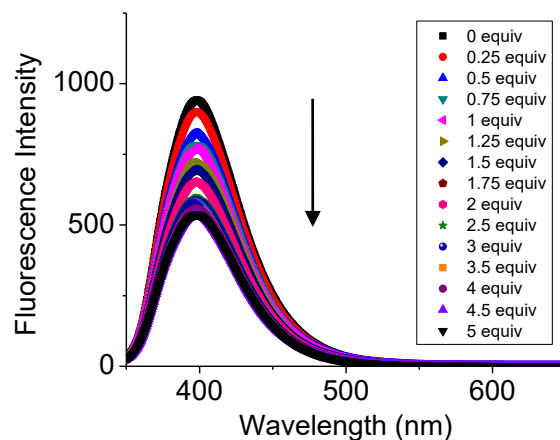

22AG (telomeric)/Na<sup>+</sup>/6-mer (13):

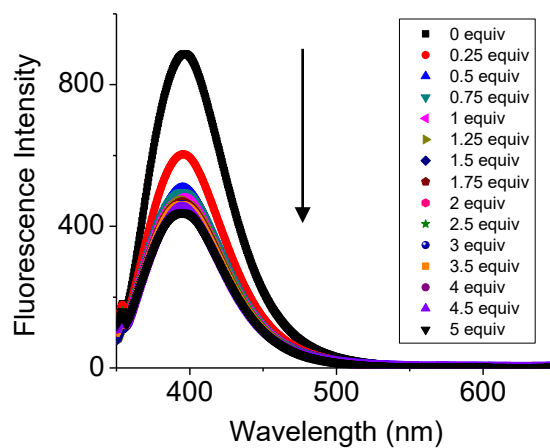

22AG (telomeric)/Na<sup>+</sup>/7-mer (14):

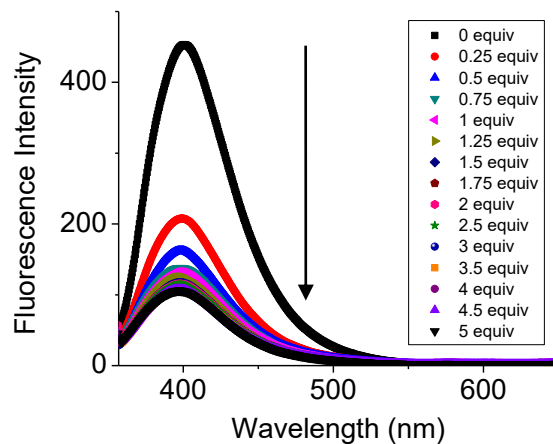

Myc2345-Pu22/K<sup>+</sup>/5-mer (10):

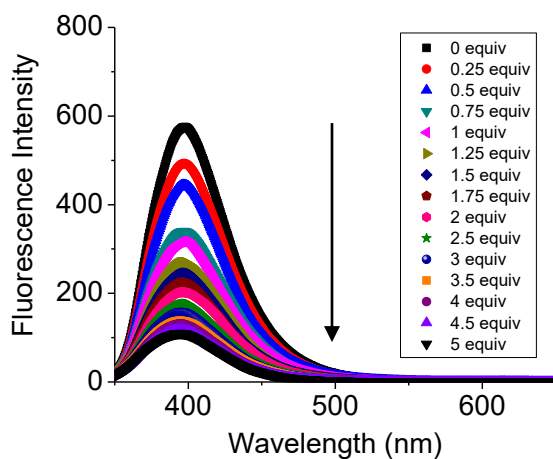

Myc2345-Pu22/K<sup>+</sup>/6-mer (13):

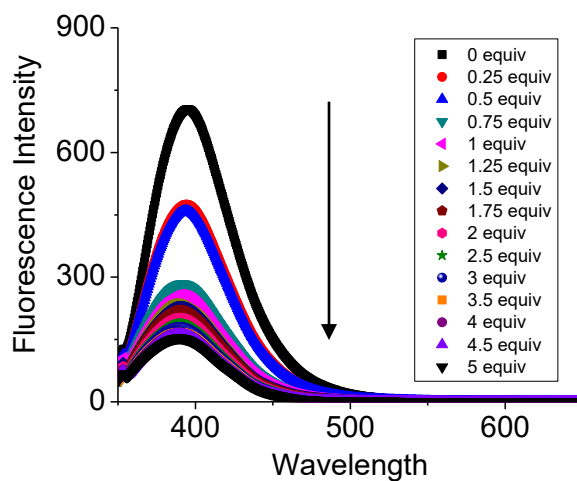

Myc2345-Pu22/K<sup>+</sup>/7-mer (14):

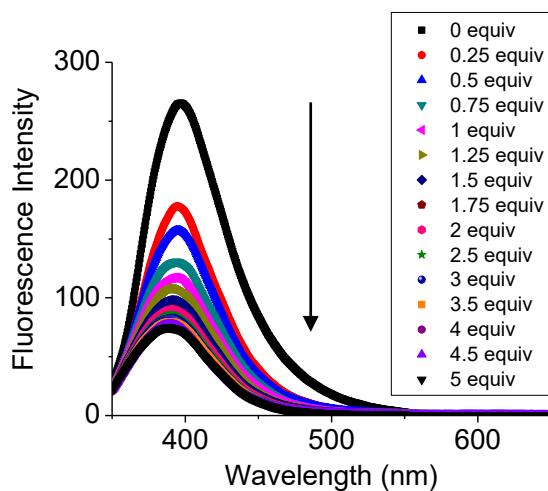

F21T/K<sup>+</sup>/7mer (**14**)/ds26:

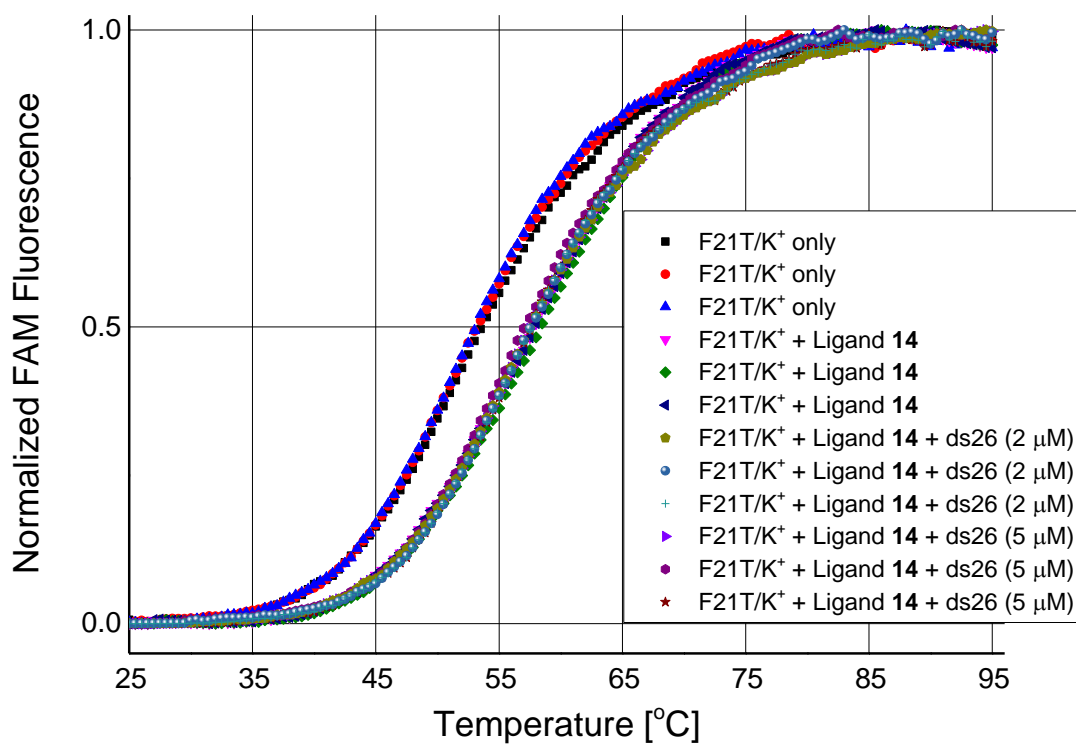

F21T/K<sup>+</sup>/6mer (**13**)/ds26:

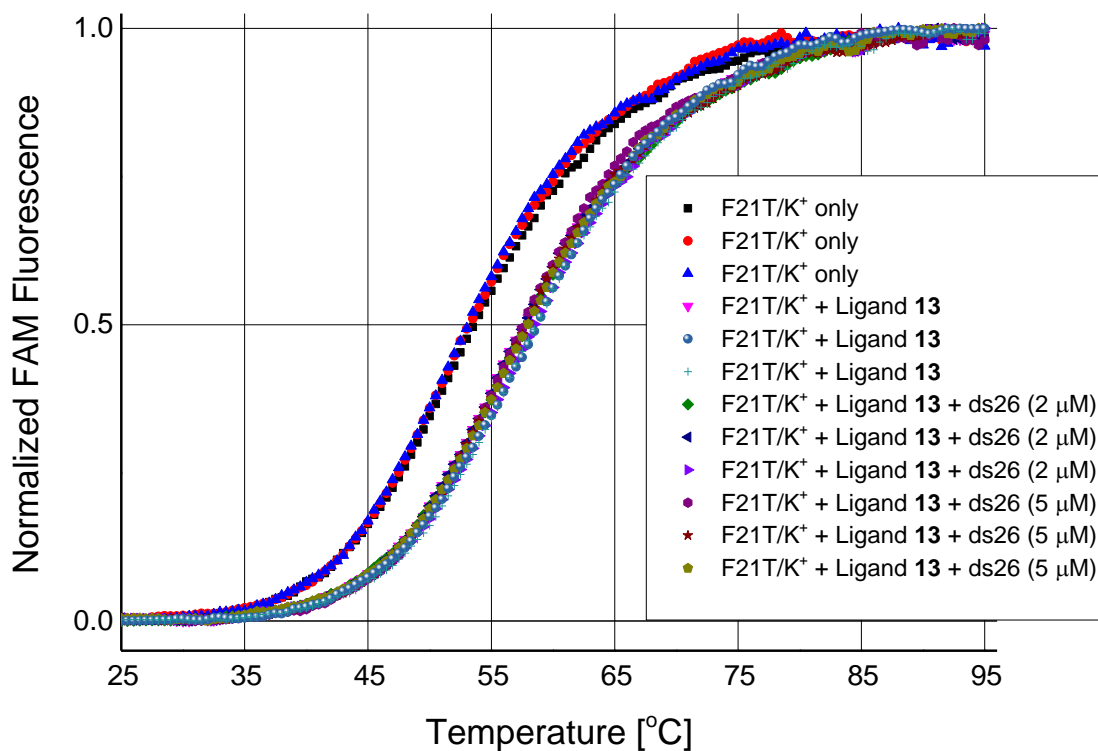



F21T/K<sup>+</sup>/5mer (**10**)/ds26:

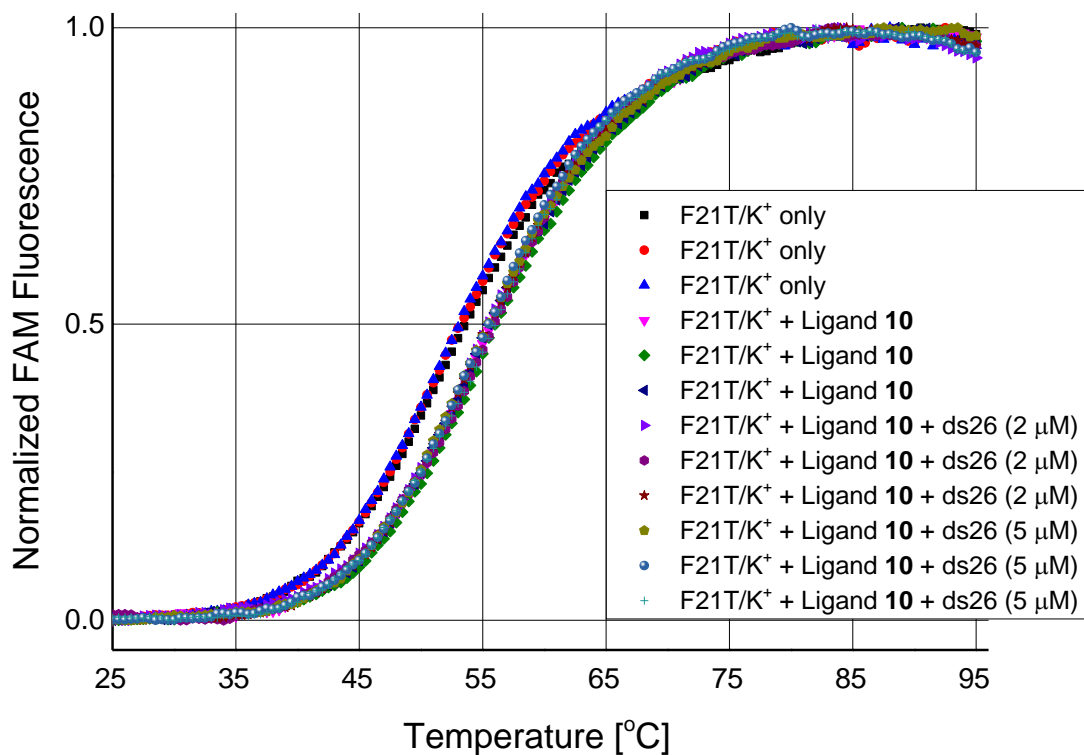

F21T/Na<sup>+</sup>/7mer (**14**)/ds26:

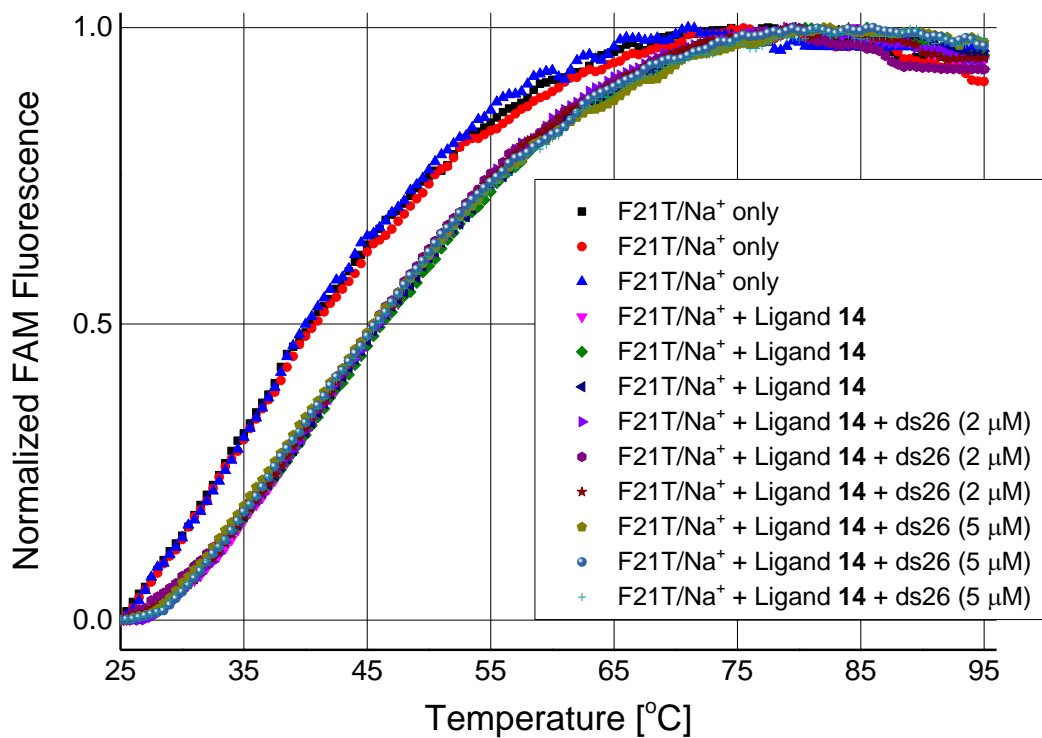

F21T/Na<sup>+</sup>/6mer (**13**)/ds26:

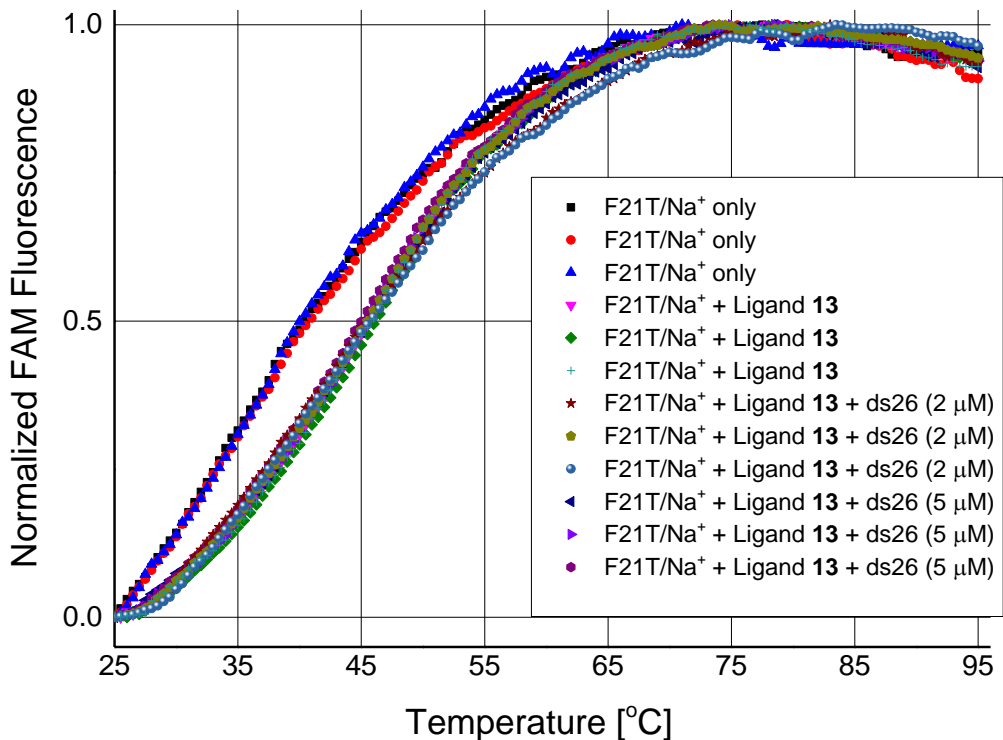

F21T/Na<sup>+</sup>/5mer (**10**)/ds26:

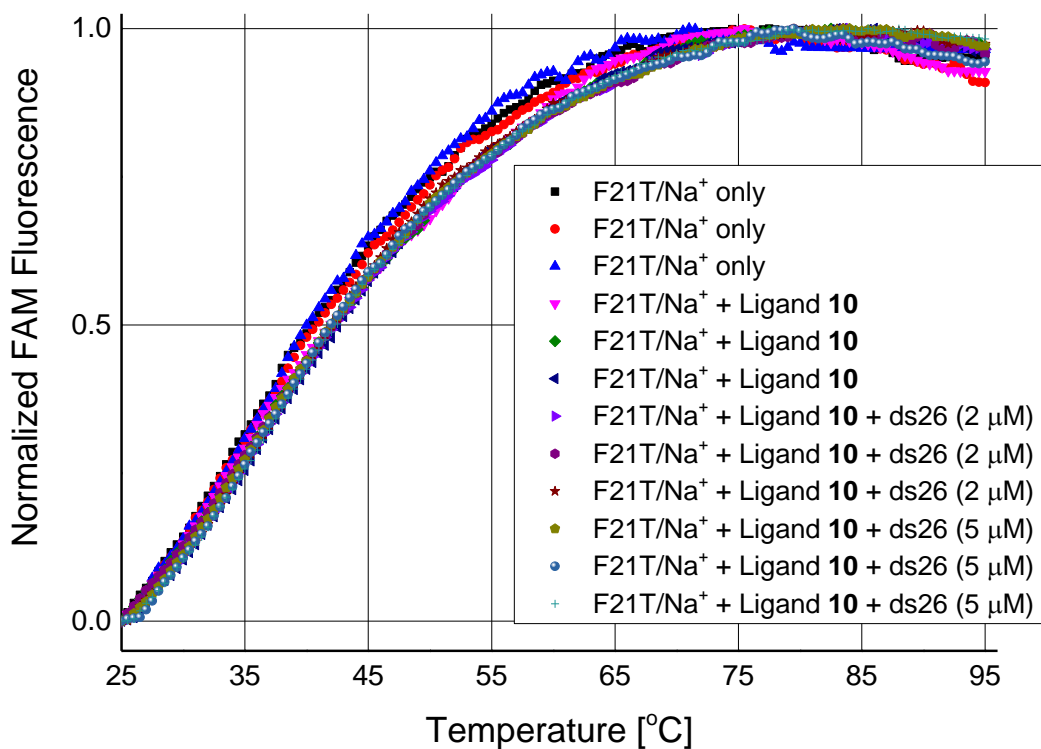

FmycT/K<sup>+</sup>/7mer (14)/ds26:

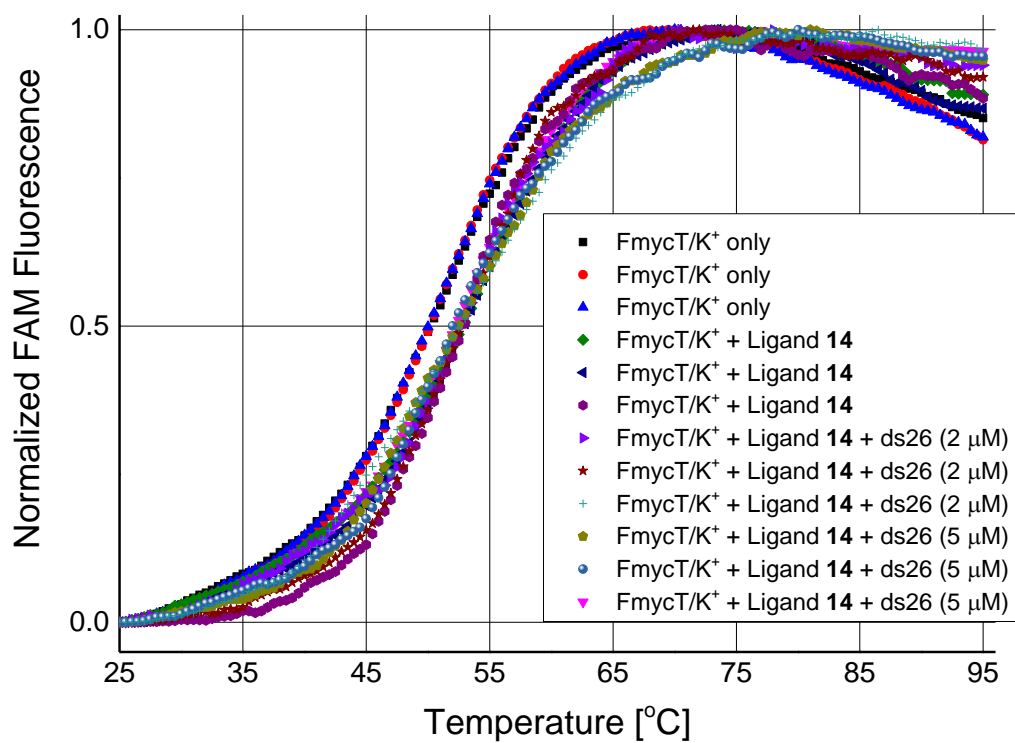

FmycT/K<sup>+</sup>/6mer (13)/ds26:

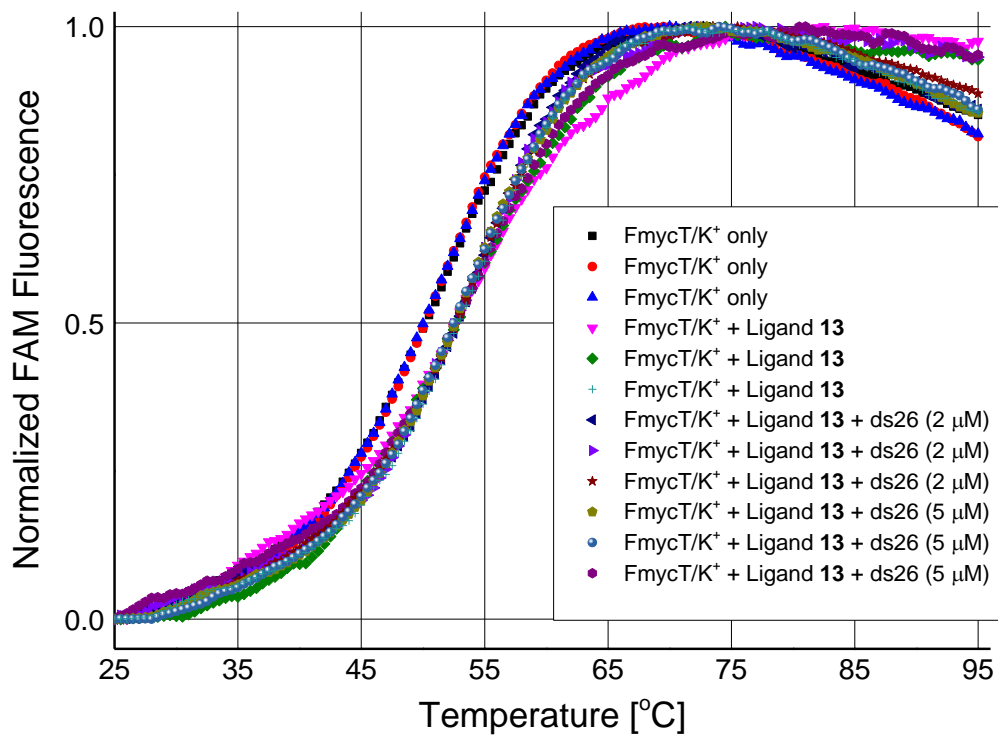

FmycT/K<sup>+</sup>/5mer (**10**)/ds26:

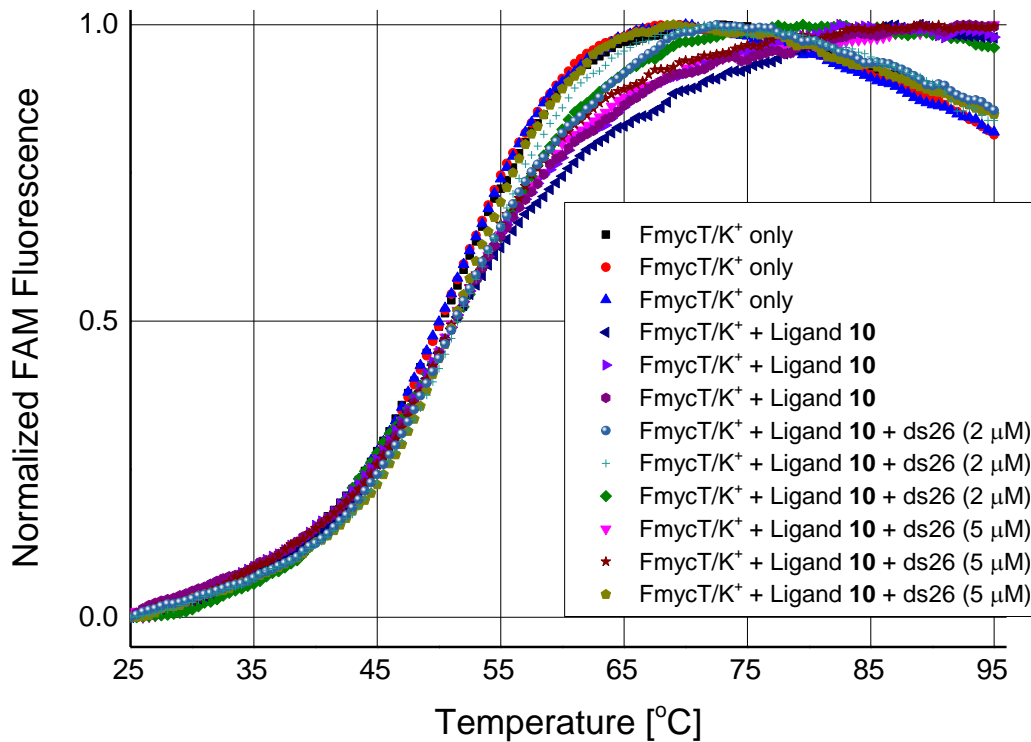

Fds26T/K<sup>+</sup>/7mer (**14**):

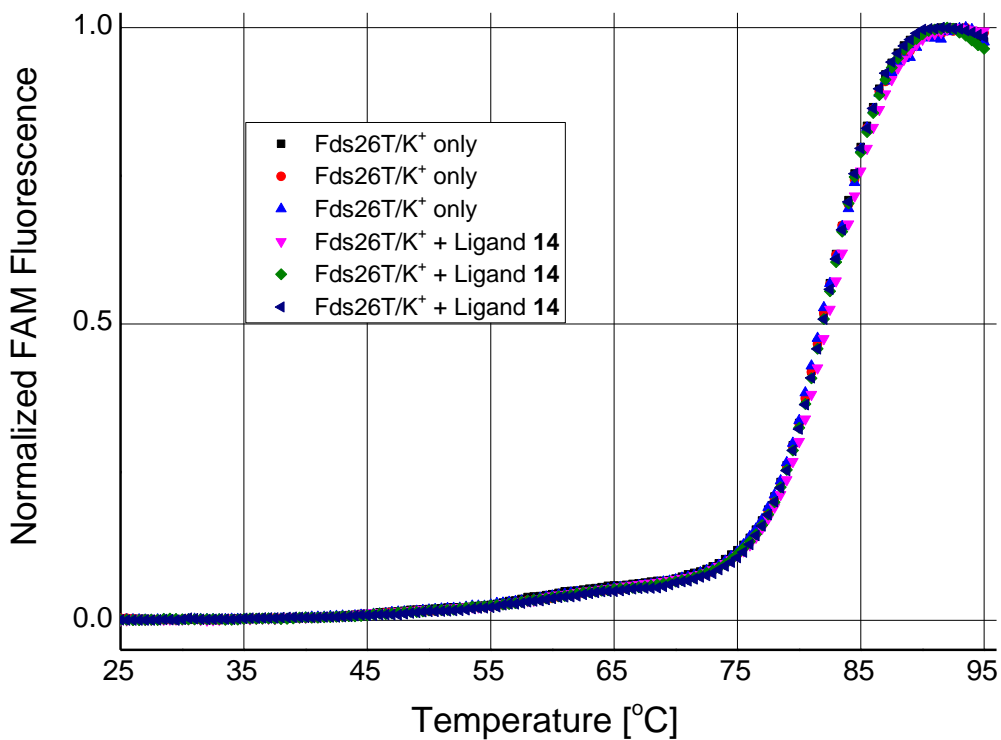

Fds26T/K<sup>+</sup>/6mer (13):

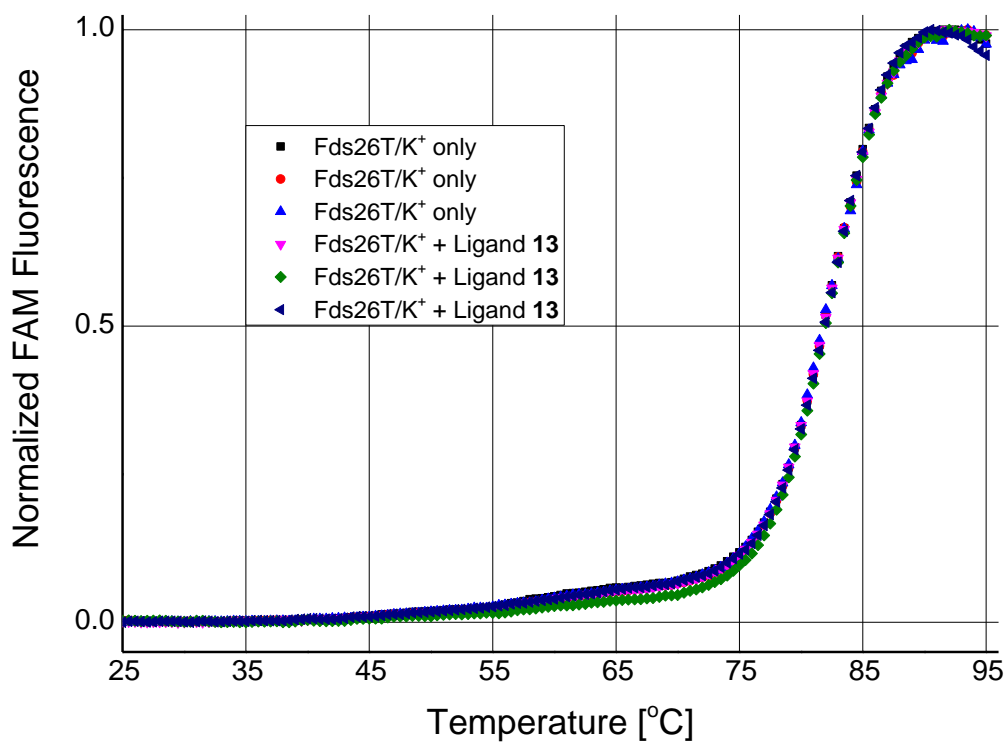

Fds26T/K<sup>+</sup>/5mer (10):

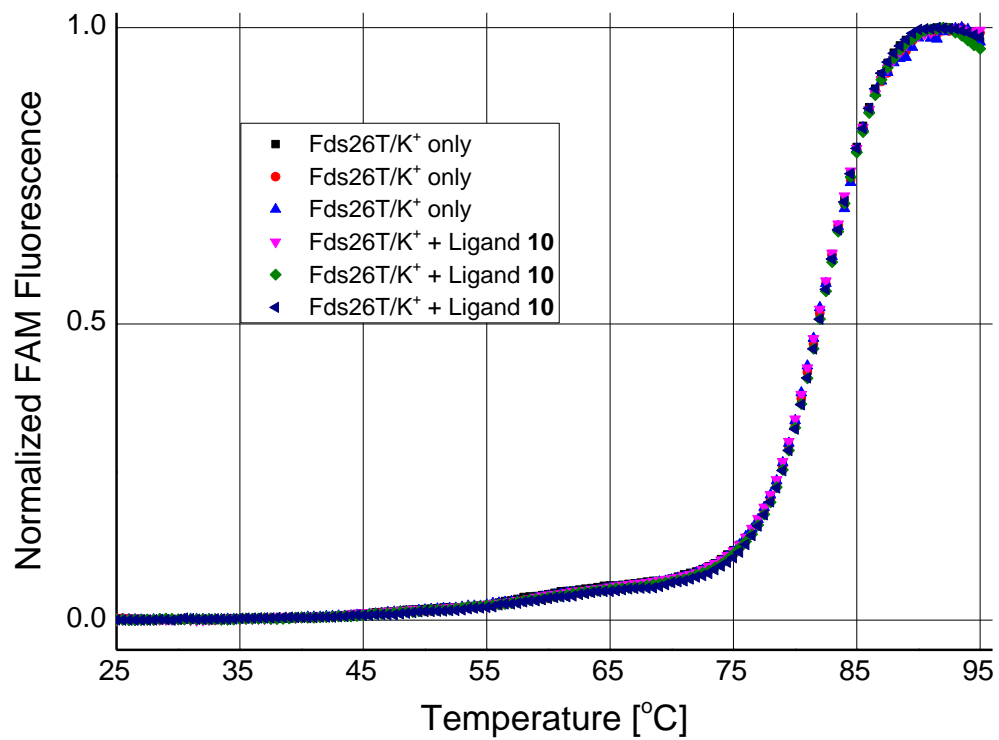

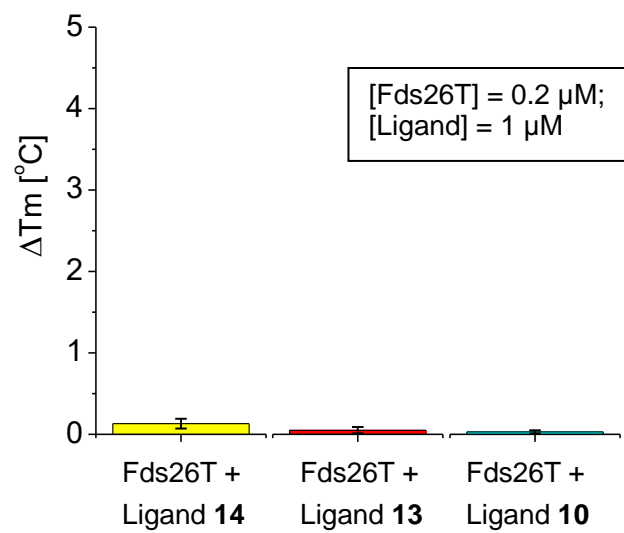

Supplement: molecules-22-02160-s001.pdf [file molecules-22-02160-s001.pdf]
